# Supplementary material for: Autonomic dysfunction and white matter microstructural changes in drug-naïve patients with Parkinson’s disease
Source: PeerJ. 2018 Sep 13;6:e5539. doi: 10.7717/peerj.5539 (PMC6139241; doi:10.7717/peerj.5539)
Supplement: Supplemental Information 1 [file peerj-06-5539-s001.xlsx]

## Sheet: PD
Enroll Category											PD characteristics				H&Y	UDPRS				HVLT-R												SFT	SDM	MOCA	GDS-15	STAI		QUIP	Scopa AUT	ESS	RBD	UPSIT					LNS
RECRUITMENT_CAT	IMAGING_CAT	ENROLL_CAT	Status	Age (baseline)	Gender	Weight(Kg)	Height(cm)	Race	Education Years	Handedness	Duration of dx (M)	Family History of PD (No)	Tremor Score	PIGD score		UPDRS Total	UPDRS3	UPDRS2	UPDRS1	DVT_TOTAL_RECALL	DVT_DELAYED_RECALL	DVT_RETENTION	DVT_RECOG_DISC_INDEX	HVLTRT1	HVLTRT2	HVLTRT3	HVLTRDLY	HVLTREC	HVLTFPRL	HVLTFPUN	HVLTVRSN					STAI State	STAI Trait					Total	1	2	3	4	LNS TOTRAW	Age Assess LNS	DVS-LNS
PD	PD	PD	Enrolled	69.5797	2	83.9	177	RAWHITE	16	1	3	0	0.363636	0	2	22	16	0	6	52	44	41	31	7	8	10	7	9	2	0	1	54	34	29	6	40	33	0	7	7	7	24	5	6	6	7	10	69	11
PD	PD	PD	Enrolled	49.7495	1	62.6	152	RAWHITE	15	1	1.03333	0	0.909091	0	1	28	24	2	2	66	61	56	57	10	12	12	12	12	0	0	1	52	47	30	5	44	33	3	3	12	4	24	7	7	4	6	14	49	14
PD	PD	PD	Enrolled	60.2519	2	79.9	178	RAWHITE	14	1	1.03333	0	0.636364	0.2	2	37	22	13	2	41	40	41	52	5	9	10	8	12	1	0	1	43	33	30	5	42	30	0	4	3	8	6	1	2	3	0	9	60	10
PD	PD	PD	Enrolled	49.4976	1	65.8	167	RAWHITE	18	1	3	0	0.0909091	0.2	2	38	26	8	4	50	38	33	39	7	10	11	8	12	3	0	1	75	51	29	5	42	44	3	8	10	6	30	8	8	7	7	11	49	11
PD	PD	PD	Enrolled	62.1684	2	89.5	177	RAWHITE	16	1	4.03333	0	1	0.2	1	29	19	6	4	44	45	48	52	5	10	10	9	12	1	0	1	55	48	30	5	30	34	2	6	3	3	30	8	7	7	8	11	62	12
PD	PD	PD	Enrolled	57.1691	2	97.5	170	RAWHITE	16	3	4.03333	0	0.545455	0	1	23	16	3	4	36	44	65	37	6	8	8	9	11	2	0	1	52	36	27	6	31	38	0	8	5	2	30	7	8	6	9	8	57	8
PD	PD	PD	Enrolled	46.0014	2	90.2	180	RAWHITE	16	3	2.03333	0	0.363636	0	2	28	20	6	2	46	49	55	57	7	10	10	10	12	0	0	1	57	53	30	6	34	32	0	1	0	3	26	1	5	10	10	14	46	14
PD	PD	PD	Enrolled	43.833	2	78.2	180	RAWHITE	18	1	2.03333	0	0.181818	0.2	1	17	10	5	2	42	39	37	49	6	8	11	8	12	1	0	1	45	46	29	5	24	25	2	0	2	7	35	10	10	7	8	13	43	13
PD	PD	PD	Enrolled	71.2471	2	83.1	170	RAWHITE	18	1	0.933333	0	1.54545	0.4	2	42	38	2	2	48	56	62	42	6	8	9	10	11	2	0	1	49	40	29	5	35	33	2	12	4	4	33	8	9	8	8	10	71	12
PD	PD	PD	Enrolled	49.8344	2	99.1	188	HISPLAT+RAWHITE	16	1	0.933333	0	0.545455	0.4	2	30	17	7	6	63	61	56	57	9	12	12	12	12	0	0	1	61	70	30	2	42	40	0	17	3	3	24	6	4	8	6	11	49	11
PD	PD	PD	Enrolled	38.4997	2	88.1	173	RAWHITE	17	1	1.96667	1	0.0909091	0.2	1	17	8	5	4	59	49	44	58	9	12	11	10	12	0	0	1	41	50	29	4	33	43	0	5	5	8	31	8	7	8	8	11	38	10
PD	PD	PD	Enrolled	57.4182	1	57	163	RAWHITE	13	1	23.3333	0	0.454545	0.2	2	26	20	2	4	39	80	80	44	6	9	8	4	11	1	0	1	58	42	26	5	32	33	0	6	6	1	29	8	7	7	7	12	57	13
PD	PD	PD	Enrolled	63.0828	1	93.4	149	RAWHITE	16	1	36.5	0	0.545455	0.4	2	38	26	8	4	60	58	57	59	9	11	11	11	12	0	0	1	43	53	27	5	24	28	2	8	8	2	18	5	4	4	5	10	63	11
PD	PD	PD	Enrolled	62.2505	1	53.6	161	RAWHITE	18	1	10.2	1	0.818182	0.2	1	20	18	0	2	48	35	30	44	6	11	10	7	10	0	0	1	53	39	22	5	28	30	0	0	9	2	36	10	9	9	8	11	62	12
PD	PD	PD	Enrolled	50.4997	2	81.7	175	RAWHITE	18	1	4.06667	0	0.727273	0.2	1	28	21	1	6	43	44	47	45	7	8	10	9	12	2	0	1	63	51	28	5	36	35	0	5	7	1	27	7	5	7	8	13	50	13
PD	PD	PD	Enrolled	57.2485	1	66.7	171	RAWHITE	20	1	10.1667	0	0.636364	0.4	1	19	15	2	2	41	33	31	51	5	10	9	7	12	1	0	1	53	49	28	5	25	33	0	2	1	3	24	7	6	6	5	11	57	12
PD	PD	PD	Enrolled	71.7481	2	65.9	168	RAASIAN	18	1	11.2	1	0.363636	0.2	2	46	41	1	4	56	48	43	47	6	10	11	8	10	0	0	1	36	37	25	3	42	47	0	23	10	7	7	2	2	3	0	8	71	10
PD	PD	PD	Enrolled	59.0856	1	61.2	171	RAWHITE	16	1	3.06667	0	0.272727	0.2	1	17	13	2	2	51	56	62	52	9	10	9	11	12	1	0	1	52	46	30	4	26	37	0	8	3	1	32	9	9	7	7	14	59	15
PD	PD	PD	Enrolled	54.4969	1	56.1	152	RAWHITE	16	2	3	0	0.545455	0.4	1	20	16	2	2	56	55	55	58	8	11	11	11	12	0	0	1	59	38	29	5	26	30	0	13	0	4	36	9	9	9	9	12	54	12
PD	PD	PD	Enrolled	67.2498	2	74.3	175	RAWHITE	18	1	5.1	3	0.454545	0	1	20	16	2	2	26	32	47	38	3	6	7	6	10	1	0	1	67	41	28	5	31	31	0	12	6	2	28	7	8	5	8	9	67	10
PD	PD	PD	Enrolled	54.0835	1	53	163	RAWHITE	14	1	9.16667	0	0.636364	0.2	1	32	21	3	8	56	50	48	58	9	11	10	10	12	0	0	1	50	50	26	5	40	38	0	10	7	4	36	9	9	8	10	12	54	12
PD	PD	PD	Enrolled	69.2512	2	122.2	191	RAWHITE	20	1	3.03333	0	0.454545	0.6	2	41	28	1	12	52	48	46	47	5	10	10	8	11	1	0	1	29	39	29	4	43	47	0	15	12	8	22	4	7	3	8	10	69	11
PD	PD	PD	Enrolled	66.5818	1	60.3	165	RAWHITE	18	1	7.1		0.727273	0.6	1	35	18	11	6	58	63	57	52	7	11	12	12	11	0	0	1	56	43	26	4	38	43	0	11	6	7	30	8	8	7	7	8	66	9
PD	PD	PD	Enrolled	54.3381	1	63	165	RAWHITE	18	1	5.1	2	0.0909091	0.2	1	15	7	2	6	51	50	55	51	9	10	9	10	12	1	0	1	76	64	27	5	31	37	0	12	10	4	37	10	8	10	9	12	54	12
PD	PD	PD	Enrolled	63.0828	2	73.8	165	RAWHITE	14	1	5.1	0	0.636364	0.2	1	18	14	2	2	49	47	44	45	6	9	11	9	12	2	0	1	26	43	26	5	30	31	0	4	3	2	22	8	6	3	5	9	63	10
PD	PD	PD	Enrolled	39.165	1	71.4	170	RAWHITE	15	1	2.03333	1	0.818182	0	1	26	15	1	10	54	44	38	58	8	10	12	9	12	0	0	1	39	47	29	4	34	32	0	2	4	6	20	3	6	6	5	15	39	15
PD	PD	PD	Enrolled	48.9144	2	97.3	183	RAWHITE	16	1	2.03333	0	0.454545	0.2	1	18	9	3	6	58	55	49	57	8	11	12	11	12	0	0	1	42	50	28	6	29	32	0	5	6	3	12	0	9	2	1	12	48	12
PD	PD	PD	Enrolled	61.2512	2	122.7	183	RAWHITE	12	1	2.03333	0	0.454545	0.2	2	32	22	4	6	53	56	50	36	6	11	12	11	11	2	0	1	50	41	29	3	35	30	2	7	5	2	29	7	7	6	9	13	61	14
PD	PD	PD	Enrolled	45.1663	2	77.3	183	RAWHITE	16	1	5.1	0	0.363636	0.2	2	29	22	3	4	39	54	50	57	4	8	12	11	12	0	0	1	62	35	30	4	39	37	0	7	9	3	30	8	7	6	9	9	45	9
PD	PD	PD	Enrolled	49.8344	2	100	178	RABLACK	16	1	12.2	0	0.818182	0.2	2	41	26	3	12	45	50	42	39	7	7	12	10	12	3	0	1	46	42	29	1	62	65	2	12	11	7	23	4	7	6	6	13	49	13
PD	PD	PD	Enrolled	53.7495	1	77.3	163	RAWHITE	16	2	6.06667	1	0.0909091	0.2	1	13	4	7	2	66	55	48	37	10	12	12	11	11	2	0	1	70	56	29	5	24	25	3	5	6	4	31	8	8	7	8	12	53	12
PD	PD	PD	Enrolled	70.0862	1	62.3	163	RAWHITE	17	1	2.03333	0	0.727273	0.2	2	36	14	18	4	52	52	47	53	5	9	11	9	12	1	0	1	45	41	29	5	32	37	0	4	12	3	24	6	4	6	8	8	70	10
PD	PD	PD	Enrolled	48.501	2	86.4	183	RAWHITE	22	1	8.1	0	0.454545	0.4	2	36	9	25	2	58	61	56	57	8	11	12	12	12	0	0	1	55	50	30	6	25	27	0	2	1	1	15	5	4	3	3	14	48	14
PD	PD	PD	Enrolled	51.8303	2	73.6	174	RAWHITE	13	1	19.3333	1	0.909091	0	2	34	17	3	14	30	21	25	39	4	8	8	5	11	2	0	1	33	35	27	2	54	65	0	13	6	9	26	6	7	7	6	9	51	9
PD	PD	PD	Enrolled	56.334	1	65.9	163	RAWHITE	16	1	5.1	0	0.0909091	0	2	18	11	3	4	54	55	55	51	8	10	11	11	12	1	0	1	63	45	28	6	37	35	0	6	6	8	37	10	10	8	9	9	56	10
PD	PD	PD	Enrolled	50.4997	1	76.4	163	RAWHITE	19	1	6.06667	0	0.363636	0	2	31	17	2	12	33	50	56	57	4	7	10	10	12	0	0	1	50	48	30	3	54	58	0	14	5	5	7	1	4	0	2	12	50	12
PD	PD	PD	Enrolled	59.5866	2	134.5	191	RAWHITE	14	1	6.13333	1	0.818182	0.2	2	43	33	0	10	23	40	65	28	3	7	6	8	11	3	0	1	44	20	25	4	54	52	0	4	6	4	13	1	3	6	3	9	59	10
PD	PD	PD	Enrolled	65.5031	2	85.5	170	RAWHITE	16	1	6.13333	1	0.727273	0	2	32	24	2	6	31	80	80	45	6	5	7	3	11	1	0	1	45	46	26	1	33	40	1	7	6	1	26	7	6	8	5	12	65	13
PD	PD	PD	Enrolled	59.0007	2	105.2	175	RAWHITE	16	1	23.3	0	0.454545	0.2	2	53	38	3	12	25	35	55	80	4	7	6	7	11	4	6	1	51	50	27	5	47	42	0	18	15	12	10	2	2	2	4	12	59	13
PD	PD	PD	Enrolled	63.4141	2	93.2	178	RAWHITE	12	2	12.1667	0	0.272727	0.4	2	58	29	15	14	24	21	25	31	4	4	7	4	11	3	0	1	39	46	28	3	51	55	0	4	3	5	29	6	8	8	7	11	63	12
PD	PD	PD	Enrolled	37.9986	2	74.1	178	RAWHITE	16	2	6.03333	0	0.0909091	0.2	2	34	17	9	8	61	60	57	58	9	12	12	12	12	0	0	1	65	57	30	2	36	60	0	8	6	3	39	9	10	10	10	15	37	15
PD	PD	PD	Enrolled	65.7467	1	71	160	RAWHITE	15	1	5.03333	0	0.545455	0	2	24	20	2	2	33	32	39	80	5	6	8	6	12	4	6	1	47	44	28	4	27	26	0	9	4	2	22	8	7	2	5	12	65	13
PD	PD	PD	Enrolled	60.9993	2	94.3	188	RAWHITE	20	1	3.06667	1	0.818182	0.4	2	45	36	5	4	39	45	48	80	5	8	10	9	11	6	6	1	29	30	27	4	36	38	0	27	7	9	11	4	0	4	3	11	61	12
PD	PD	PD	Enrolled	49.1691	2	77.3	178	RAWHITE	14	1	23.3667	1	0.727273	0.2	2	37	26	7	4	35	32	46	80	6	8	8	7	11	6	6	1	33	51	26	4	39	37	0	15	7	8	24	4	7	6	7	12	49	12
PD	PD	PD	Enrolled	62.9158	2	107.9	182	RAWHITE	16	1	3.03333	1	0.363636	0.4	1	26	16	6	4	27	35	55	80	5	6	7	7	12	4	6	1	37	47	27	4	39	37	0	10	3	1	32	9	7	7	9	9	62	10
PD	PD	PD	Enrolled	52.4983	2	81.6	182	RAWHITE	16	1	1.03333	0	0.181818	0.2	1	19	9	8	2	33	44	47	80	5	6	10	9	11	5	6	1	52	50	29	4	32	33	0	7	1	9	25	6	8	4	7	15	52	15
PD	PD	PD	Enrolled	49.1718	1	79.4	165	RAWHITE	12	1	29.4667	2	1.36364	0	1	45	30	11	4	33	21	80	80	4	8	9	5	12	3	6	1	36	38	29	4	42	53	0	22	4	3	27	7	6	6	8	13	49	13
PD	PD	PD	Enrolled	62.7488	2	111.1	173	HISPLAT+RAWHITE	17	1	1.96667	0	0.272727	0	1	17	11	4	2	34	45	55	80	4	8	9	9	12	6	6	1	56	42	27	6	24	26	0	8	4	4	26	5	7	8	6	8	62	8
PD	PD	PD	Enrolled	55.3292	1	106.5	170	RAWHITE	13	1	0.933333	0	0.181818	0	1	21	11	8	2	80	80	80	80	2	3	8	4	10	6	6	1	40	31	25	5	25	30	0	1	3	3	23	6	6	5	6	9	55	10
PD	PD	PD	Enrolled	51.7481	2	97.5	181	RAWHITE	13	1	2.03333	0	0	0.2	1	29	22	1	6	30	32	46	39	5	7	8	7	11	2	0	1	53	42	27	4	53	54	0	4	6	3	28	8	6	8	6	10	51	10
PD	PD	PD	Enrolled	68.8296	2	65	165	RAWHITE	18	1	5.1	5	0.0909091	0.4	2	23	21	0	2	54	60	56	53	5	10	11	11	12	1	0	1	46	35	29	1	36	42	0	6	13	3	22	4	7	6	5	13	68	14
PD	PD	PD	Enrolled	58.9158	2	74	178	RAWHITE	12	1	3.06667	0	0.0909091	0.4	2	27	23	2	2	34	80	80	36	6	8	7	0	9	0	0	1	43	39	30	6	37	39	1	6	9	5	15	5	7	1	2	13	58	14
PD	PD	PD	Enrolled	54.8364	1	70	167	RAWHITE	12	1	13.2	0	0.727273	0.4	2	47	41	0	6	49	39	39	37	7	10	10	8	11	2	0	1	62	47	29	4	62	55	0	11	10	2	23	7	6	5	5	14	54	14
PD	PD	PD	Enrolled	62.4969	2	90	180	RAWHITE	18	1	10.1667	0	0.272727	0.4	2	29	23	4	2	51	61	55	52	7	9	12	12	12	1	0	1	43	37	28	6	46	36	2	12	10	3	19	3	5	5	6	10	62	11
PD	PD	PD	Enrolled	61.9192	2	68	168	RAWHITE	11	2	12.2	1	0.545455	0.2	2	37	30	5	2	32	45	64	44	5	7	8	9	11	1	0	1	35	45	29	5	48	51	0	8	7	1	21	7	5	5	4	9	61	10
PD	PD	PD	Enrolled	51.9151	1	78	175	RAWHITE	12	1	5.06667	0	0.545455	0.2	1	28	24	2	2	63	55	49	51	9	12	12	11	12	1	0	1	46	36	29	3	52	64	0	15	8	3	18	2	5	4	7	10	51	10
PD	PD	PD	Enrolled	69.5825	1	85	174	RAWHITE	11	1	4.03333	0	0.181818	0.2	2	22	20	0	2	62	48	43	31	9	10	11	8	9	2	0	1	38	38	26	5	32	27	0	4	7	6	23	7	5	5	6	12	69	13
PD	PD	PD	Enrolled	72	2	100	184	RAWHITE	16	1	18.2333	0	0.272727	0	1	12	7	3	2	42	44	56	42	6	7	7	7	12	3	0	1	48	48	25	3	34	32	2	11	9	9	22	5	7	4	6	8	71	10
PD	PD	PD	Enrolled	48.835	2	84	175	RAWHITE	15	1	5.1	2	0.0909091	0	1	11	7	2	2	38	44	56	39	6	8	9	9	11	1	1	1	34	53	29	5	35	28	0	3	2	3	30	7	7	8	8	12	48	12
PD	PD	PD	Enrolled	57.588	1	52	164	RAWHITE	14	3	3.06667	0	0.727273	0.2	2	32	26	4	2	61	61	55	58	8	12	12	12	12	0	0	1	56	33	30	5	29	26	3	22	10	1	15	3	2	5	5	11	57	12
PD	PD	PD	Enrolled	40.9144	2	84.6	186	RAWHITE	14	1	3	1	0	0	2	12	10	0	2	62	54	50	39	10	11	12	11	11	1	0	1	62	60	28	5	44	44	0	10	8	2	28	7	8	6	7	14	40	14
PD	PD	PD	Enrolled	56.7474	2	79	176	RAWHITE	13	1	14.2	0	0.0909091	0.2	2	24	16	0	8	44	80	80	37	7	8	10	3	12	3	0	1	43	36	24	5	37	39	2	18	6	5	20	4	7	6	3	13	57	14
PD	PD	PD	Enrolled	72.835	1	55	163	RAWHITE	10	1	0.966667	0	0	0.2	2	30	22	0	8	50	48	46	31	6	8	10	8	11	4	0	1	48	23	29	5	42	40	0	5	7	1	5	1	2	1	1	9	72	11
PD	PD	PD	Enrolled	56.2464	2	88	174	RAWHITE	9	1	2.03333	0	0.363636	0.4	1	38	18	14	6	39	39	46	37	6	8	9	8	11	2	0	1	38	33	21	3	30	34	1	5	9	1	26	6	6	8	6	7	55	7
PD	PD	PD	Enrolled	56.501	2	85	174	RAWHITE	10	1	2.03333	0	0.272727	0	1	12	7	3	2	56	55	55	51	9	10	11	11	12	1	0	1	46	49	27	6	48	41	0	6	5	4	29	6	7	8	8	10	57	11
PD	PD	PD	Enrolled	54.7515	1	95	175	RAWHITE	11	1	4.1	0	0.272727	0.2	1	25	16	1	8	56	55	55	58	8	11	11	11	12	0	0	1	56	40	28	1	51	54	1	22	11	6	14	3	2	5	4	12	55	13
PD	PD	PD	Enrolled	58.5818	2	82	180	RAWHITE	10	1	4.06667	1	0.363636	0.2	1	27	14	9	4	53	45	55	36	12	9	8	9	12	3	0	1	40	37	28	5	24	25	2	3	5	1	17	4	6	5	2	20	58	19
PD	PD	PD	Enrolled	67.5866	1	78	166	RAWHITE	8	1	2.03333	0	0.545455	0.6	1	31	20	3	8	31	32	39	31	4	6	8	6	12	3	1	1	66	45	25	5	47	38	2	6	5	4	23	4	7	7	5	5	67	5
PD	PD	PD	Enrolled	51.1677	1	50	168	RAWHITE	13	1	4.06667	0	0.636364	0.4	1	27	15	6	6	60	44	47	51	12	10	10	9	12	1	0	1	81	45	27	5	27	32	0	6	6	4	24	6	6	7	5	6	51	6
PD	PD	PD	Enrolled	75.5866	2	89	187	RAWHITE	14	1	4.1	0	0.545455	0.2	1	34	27	3	4	73	64	56	60	11	12	12	12	12	0	0	1	45	39	28	2	40	39	0	16	10	7	28	7	8	4	9	11	75	14
PD	PD	PD	Enrolled	60.5804	1	69	165	RAWHITE	15	1	3	0	0.272727	0.4	1	27	14	11	2	48	51	55	60	8	9	10	10	12	0	0	1	46	37	29	5	33	32	0	2	4	3	23	7	8	4	4	12	60	13
PD	PD	PD	Enrolled	52.9172	1	69	175	RAWHITE	12	1	2.03333	0	0.0909091	0.2	2	32	25	5	2	43	38	39	33	7	8	10	8	9	1	0	1	57	41	26	5	29	26	0	5	5	2	35	7	10	10	8	11	52	11
PD	PD	PD	Enrolled	50.5024	1	59.4	168	RAWHITE	19	1	3.06667	0	0.545455	0	2	39	28	5	6	43	50	56	57	6	9	10	10	12	0	0	1	58	50	30	2	52	54	0	7	1	3	22	5	6	6	5	13	50	13
PD	PD	PD	Enrolled	60.7556	2			RAWHITE	18	3	2.06667	0	0.545455	0.2	2	42	38	2	2	37	45	55	80	5	8	9	9	12	5	0	1	56	49	25	5	57	57	0	5	8	8	14	5	2	2	5	13	60	14
PD	PD	PD	Enrolled	47.4962	2	89.2	187	RAWHITE	18	1	6.06667	1	0.272727	0.2	2	39	30	5	4	39	39	42	33	5	9	10	8	11	2	0	1	49	35	29	5	43	48	0	3	3	3	31	7	8	7	9	12	47	12
PD	PD	PD	Enrolled	72.334	2	74.8	170	RAWHITE	18	1	4.06667	0	0.454545	0.4	2	49	34	11	4	54	60	56		6	9	11	11				1	50	34	27	4	33	37	0	11	10	1	20	4	4	7	5	10	72	12
PD	PD	PD	Enrolled	49.1691	1	63.1	170	RAWHITE	14	1	2.03333	0	0.545455	0.4	2	51	33	12	6	45	50	56	45	6	10	10	10	11	1	0	1	62	53	25	5	25	47	0	11	4	3	37	9	9	10	9	9	49	9
PD	PD	PD	Enrolled	66.3381	2	88.1	170	RAWHITE	16	1	7.1	0	0.0909091	0.6	2	43	27	12	4	51	47	44	45	6	10	11	9	12	2	0	1	46	34	28	6	28	32	0	11	13	3	38	9	9	10	10	13	66	14
PD	PD	PD	Enrolled	48.7502	2	84	188	RAWHITE	16	1	3.06667	0	0.363636	0.2	1	37	20	15	2	60	61	56	45	8	12	12	12	12	2	0	1	65	42	30	5	29	33	0	6	9	7	14	2	5	3	4	12	48	12
PD	PD	PD	Enrolled	74.7543	2	92.9	180	RAWHITE	18	1	22.4	0	1.27273	0.4	2	50	41	7	2	57	56	52	60	6	10	11	10	12	0	0	1	50	41	28	5	24	25	0	4	1	2	26	5	6	7	8	8	74	10
PD	PD	PD	Enrolled	52.8323	2	113	188	RAWHITE	12	1	8.1	0	0	0.2	1	19	12	3	4	38	50	56	51	5	8	10	10	11	0	0	1	58	50	28	5	31	33	0	14	6	3	20	6	7	1	6	17	52	18
PD	PD	PD	Enrolled	70.8337	1	72.5	168	RAWHITE	16	1	1.96667	0	0.636364	0.2	2	40	25	9	6	66	63	56	59	8	12	12	12	12	0	0	1	52	49	24	4	43	37	0	14	4	0	10	1	4	2	3	13	70	15
PD	PD	PD	Enrolled	66.0014	2	79.6	181	RAWHITE	15	2	5.1	0	0.0909091	0.4	2	30	18	6	6	44	42	49	38	7	8	9	8	11	2	0	1	56	36	26	5	45	40	0	8	5	2	32	6	9	8	9	10	65	11
PD	PD	PD	Enrolled	45.9165	2	69.6	171	RAWHITE	12	1	8.16667	3	0.545455	0	1	21	18	1	2	44	59	68	57	6	10	10	12	12	0	0	1	60	50	29	5	27	25	0	2	2	1	27	4	8	7	8	13	45	13
PD	PD	PD	Enrolled	55.7481	2	74.3	175	RAWHITE	13	1	17.2333	0	0.181818	0.6	2	48	24	14	10	46	55	55	58	6	9	11	11	12	0	0	1	25	19	26	5	54	51	0	16	9	5	35	8	9	9	9	11	55	12
[truncated: 5 more columns]

## Sheet: H&Y=2
Enroll Category											PD characteristics				H&Y	UDPRS				HVLT-R												SFT	SDM	MOCA	GDS-15	STAI		QUIP	Scopa AUT	ESS	RBD	UPSIT					LNS
RECRUITMENT_CAT	IMAGING_CAT	ENROLL_CAT	Status	Age (baseline)	Gender	Weight(Kg)	Height(cm)	Race	Education Years	Handedness	Duration of dx (M)	Family History of PD (No)	Tremor Score	PIGD score		UPDRS Total	UPDRS3	UPDRS2	UPDRS1	DVT_TOTAL_RECALL	DVT_DELAYED_RECALL	DVT_RETENTION	DVT_RECOG_DISC_INDEX	HVLTRT1	HVLTRT2	HVLTRT3	HVLTRDLY	HVLTREC	HVLTFPRL	HVLTFPUN	HVLTVRSN					STAI State	STAI Trait					Total	1	2	3	4	LNS TOTRAW	Age Assess LNS	DVS-LNS
PD	PD	PD	Enrolled	69.5797	2	83.9	177	RAWHITE	16	1	3	0	0.363636	0	2	22	16	0	6	52	44	41	31	7	8	10	7	9	2	0	1	54	34	29	6	40	33	0	7	7	7	24	5	6	6	7	10	69	11
PD	PD	PD	Enrolled	60.2519	2	79.9	178	RAWHITE	14	1	1.03333	0	0.636364	0.2	2	37	22	13	2	41	40	41	52	5	9	10	8	12	1	0	1	43	33	30	5	42	30	0	4	3	8	6	1	2	3	0	9	60	10
PD	PD	PD	Enrolled	49.4976	1	65.8	167	RAWHITE	18	1	3	0	0.0909091	0.2	2	38	26	8	4	50	38	33	39	7	10	11	8	12	3	0	1	75	51	29	5	42	44	3	8	10	6	30	8	8	7	7	11	49	11
PD	PD	PD	Enrolled	46.0014	2	90.2	180	RAWHITE	16	3	2.03333	0	0.363636	0	2	28	20	6	2	46	49	55	57	7	10	10	10	12	0	0	1	57	53	30	6	34	32	0	1	0	3	26	1	5	10	10	14	46	14
PD	PD	PD	Enrolled	71.2471	2	83.1	170	RAWHITE	18	1	0.933333	0	1.54545	0.4	2	42	38	2	2	48	56	62	42	6	8	9	10	11	2	0	1	49	40	29	5	35	33	2	12	4	4	33	8	9	8	8	10	71	12
PD	PD	PD	Enrolled	49.8344	2	99.1	188	HISPLAT+RAWHITE	16	1	0.933333	0	0.545455	0.4	2	30	17	7	6	63	61	56	57	9	12	12	12	12	0	0	1	61	70	30	2	42	40	0	17	3	3	24	6	4	8	6	11	49	11
PD	PD	PD	Enrolled	57.4182	1	57	163	RAWHITE	13	1	23.3333	0	0.454545	0.2	2	26	20	2	4	39	80	80	44	6	9	8	4	11	1	0	1	58	42	26	5	32	33	0	6	6	1	29	8	7	7	7	12	57	13
PD	PD	PD	Enrolled	63.0828	1	93.4	149	RAWHITE	16	1	36.5	0	0.545455	0.4	2	38	26	8	4	60	58	57	59	9	11	11	11	12	0	0	1	43	53	27	5	24	28	2	8	8	2	18	5	4	4	5	10	63	11
PD	PD	PD	Enrolled	71.7481	2	65.9	168	RAASIAN	18	1	11.2	1	0.363636	0.2	2	46	41	1	4	56	48	43	47	6	10	11	8	10	0	0	1	36	37	25	3	42	47	0	23	10	7	7	2	2	3	0	8	71	10
PD	PD	PD	Enrolled	69.2512	2	122.2	191	RAWHITE	20	1	3.03333	0	0.454545	0.6	2	41	28	1	12	52	48	46	47	5	10	10	8	11	1	0	1	29	39	29	4	43	47	0	15	12	8	22	4	7	3	8	10	69	11
PD	PD	PD	Enrolled	61.2512	2	122.7	183	RAWHITE	12	1	2.03333	0	0.454545	0.2	2	32	22	4	6	53	56	50	36	6	11	12	11	11	2	0	1	50	41	29	3	35	30	2	7	5	2	29	7	7	6	9	13	61	14
PD	PD	PD	Enrolled	45.1663	2	77.3	183	RAWHITE	16	1	5.1	0	0.363636	0.2	2	29	22	3	4	39	54	50	57	4	8	12	11	12	0	0	1	62	35	30	4	39	37	0	7	9	3	30	8	7	6	9	9	45	9
PD	PD	PD	Withdrew	49.8344	2	100	178	RABLACK	16	1	12.2	0	0.818182	0.2	2	41	26	3	12	45	50	42	39	7	7	12	10	12	3	0	1	46	42	29	1	62	65	2	12	11	7	23	4	7	6	6	13	49	13
PD	PD	PD	Enrolled	70.0862	1	62.3	163	RAWHITE	17	1	2.03333	0	0.727273	0.2	2	36	14	18	4	52	52	47	53	5	9	11	9	12	1	0	1	45	41	29	5	32	37	0	4	12	3	24	6	4	6	8	8	70	10
PD	PD	PD	Enrolled	48.501	2	86.4	183	RAWHITE	22	1	8.1	0	0.454545	0.4	2	36	9	25	2	58	61	56	57	8	11	12	12	12	0	0	1	55	50	30	6	25	27	0	2	1	1	15	5	4	3	3	14	48	14
PD	PD	PD	Enrolled	51.8303	2	73.6	174	RAWHITE	13	1	19.3333	1	0.909091	0	2	34	17	3	14	30	21	25	39	4	8	8	5	11	2	0	1	33	35	27	2	54	65	0	13	6	9	26	6	7	7	6	9	51	9
PD	PD	PD	Enrolled	56.334	1	65.9	163	RAWHITE	16	1	5.1	0	0.0909091	0	2	18	11	3	4	54	55	55	51	8	10	11	11	12	1	0	1	63	45	28	6	37	35	0	6	6	8	37	10	10	8	9	9	56	10
PD	PD	PD	Enrolled	50.4997	1	76.4	163	RAWHITE	19	1	6.06667	0	0.363636	0	2	31	17	2	12	33	50	56	57	4	7	10	10	12	0	0	1	50	48	30	3	54	58	0	14	5	5	7	1	4	0	2	12	50	12
PD	PD	PD	Enrolled	59.5866	2	134.5	191	RAWHITE	14	1	6.13333	1	0.818182	0.2	2	43	33	0	10	23	40	65	28	3	7	6	8	11	3	0	1	44	20	25	4	54	52	0	4	6	4	13	1	3	6	3	9	59	10
PD	PD	PD	Enrolled	65.5031	2	85.5	170	RAWHITE	16	1	6.13333	1	0.727273	0	2	32	24	2	6	31	80	80	45	6	5	7	3	11	1	0	1	45	46	26	1	33	40	1	7	6	1	26	7	6	8	5	12	65	13
PD	PD	PD	Enrolled	59.0007	2	105.2	175	RAWHITE	16	1	23.3	0	0.454545	0.2	2	53	38	3	12	25	35	55	80	4	7	6	7	11	4	6	1	51	50	27	5	47	42	0	18	15	12	10	2	2	2	4	12	59	13
PD	PD	PD	Withdrew	63.4141	2	93.2	178	RAWHITE	12	2	12.1667	0	0.272727	0.4	2	58	29	15	14	24	21	25	31	4	4	7	4	11	3	0	1	39	46	28	3	51	55	0	4	3	5	29	6	8	8	7	11	63	12
PD	PD	PD	Enrolled	37.9986	2	74.1	178	RAWHITE	16	2	6.03333	0	0.0909091	0.2	2	34	17	9	8	61	60	57	58	9	12	12	12	12	0	0	1	65	57	30	2	36	60	0	8	6	3	39	9	10	10	10	15	37	15
PD	PD	PD	Enrolled	65.7467	1	71	160	RAWHITE	15	1	5.03333	0	0.545455	0	2	24	20	2	2	33	32	39	80	5	6	8	6	12	4	6	1	47	44	28	4	27	26	0	9	4	2	22	8	7	2	5	12	65	13
PD	PD	PD	Enrolled	60.9993	2	94.3	188	RAWHITE	20	1	3.06667	1	0.818182	0.4	2	45	36	5	4	39	45	48	80	5	8	10	9	11	6	6	1	29	30	27	4	36	38	0	27	7	9	11	4	0	4	3	11	61	12
PD	PD	PD	Enrolled	49.1691	2	77.3	178	RAWHITE	14	1	23.3667	1	0.727273	0.2	2	37	26	7	4	35	32	46	80	6	8	8	7	11	6	6	1	33	51	26	4	39	37	0	15	7	8	24	4	7	6	7	12	49	12
PD	PD	PD	Enrolled	68.8296	2	65	165	RAWHITE	18	1	5.1	5	0.0909091	0.4	2	23	21	0	2	54	60	56	53	5	10	11	11	12	1	0	1	46	35	29	1	36	42	0	6	13	3	22	4	7	6	5	13	68	14
PD	PD	PD	Enrolled	58.9158	2	74	178	RAWHITE	12	1	3.06667	0	0.0909091	0.4	2	27	23	2	2	34	80	80	36	6	8	7	0	9	0	0	1	43	39	30	6	37	39	1	6	9	5	15	5	7	1	2	13	58	14
PD	PD	PD	Enrolled	54.8364	1	70	167	RAWHITE	12	1	13.2	0	0.727273	0.4	2	47	41	0	6	49	39	39	37	7	10	10	8	11	2	0	1	62	47	29	4	62	55	0	11	10	2	23	7	6	5	5	14	54	14
PD	PD	PD	Enrolled	62.4969	2	90	180	RAWHITE	18	1	10.1667	0	0.272727	0.4	2	29	23	4	2	51	61	55	52	7	9	12	12	12	1	0	1	43	37	28	6	46	36	2	12	10	3	19	3	5	5	6	10	62	11
PD	PD	PD	Enrolled	61.9192	2	68	168	RAWHITE	11	2	12.2	1	0.545455	0.2	2	37	30	5	2	32	45	64	44	5	7	8	9	11	1	0	1	35	45	29	5	48	51	0	8	7	1	21	7	5	5	4	9	61	10
PD	PD	PD	Enrolled	69.5825	1	85	174	RAWHITE	11	1	4.03333	0	0.181818	0.2	2	22	20	0	2	62	48	43	31	9	10	11	8	9	2	0	1	38	38	26	5	32	27	0	4	7	6	23	7	5	5	6	12	69	13
PD	PD	PD	Enrolled	57.588	1	52	164	RAWHITE	14	3	3.06667	0	0.727273	0.2	2	32	26	4	2	61	61	55	58	8	12	12	12	12	0	0	1	56	33	30	5	29	26	3	22	10	1	15	3	2	5	5	11	57	12
PD	PD	PD	Enrolled	40.9144	2	84.6	186	RAWHITE	14	1	3	1	0	0	2	12	10	0	2	62	54	50	39	10	11	12	11	11	1	0	1	62	60	28	5	44	44	0	10	8	2	28	7	8	6	7	14	40	14
PD	PD	PD	Enrolled	56.7474	2	79	176	RAWHITE	13	1	14.2	0	0.0909091	0.2	2	24	16	0	8	44	80	80	37	7	8	10	3	12	3	0	1	43	36	24	5	37	39	2	18	6	5	20	4	7	6	3	13	57	14
PD	PD	PD	Enrolled	72.835	1	55	163	RAWHITE	10	1	0.966667	0	0	0.2	2	30	22	0	8	50	48	46	31	6	8	10	8	11	4	0	1	48	23	29	5	42	40	0	5	7	1	5	1	2	1	1	9	72	11
PD	PD	PD	Enrolled	52.9172	1	69	175	RAWHITE	12	1	2.03333	0	0.0909091	0.2	2	32	25	5	2	43	38	39	33	7	8	10	8	9	1	0	1	57	41	26	5	29	26	0	5	5	2	35	7	10	10	8	11	52	11
PD	PD	PD	Enrolled	50.5024	1	59.4	168	RAWHITE	19	1	3.06667	0	0.545455	0	2	39	28	5	6	43	50	56	57	6	9	10	10	12	0	0	1	58	50	30	2	52	54	0	7	1	3	22	5	6	6	5	13	50	13
PD	PD	PD	Enrolled	60.7556	2			RAWHITE	18	3	2.06667	0	0.545455	0.2	2	42	38	2	2	37	45	55	80	5	8	9	9	12	5	0	1	56	49	25	5	57	57	0	5	8	8	14	5	2	2	5	13	60	14
PD	PD	PD	Enrolled	47.4962	2	89.2	187	RAWHITE	18	1	6.06667	1	0.272727	0.2	2	39	30	5	4	39	39	42	33	5	9	10	8	11	2	0	1	49	35	29	5	43	48	0	3	3	3	31	7	8	7	9	12	47	12
PD	PD	PD	Enrolled	72.334	2	74.8	170	RAWHITE	18	1	4.06667	0	0.454545	0.4	2	49	34	11	4	54	60	56		6	9	11	11				1	50	34	27	4	33	37	0	11	10	1	20	4	4	7	5	10	72	12
PD	PD	PD	Enrolled	49.1691	1	63.1	170	RAWHITE	14	1	2.03333	0	0.545455	0.4	2	51	33	12	6	45	50	56	45	6	10	10	10	11	1	0	1	62	53	25	5	25	47	0	11	4	3	37	9	9	10	9	9	49	9
PD	PD	PD	Enrolled	66.3381	2	88.1	170	RAWHITE	16	1	7.1	0	0.0909091	0.6	2	43	27	12	4	51	47	44	45	6	10	11	9	12	2	0	1	46	34	28	6	28	32	0	11	13	3	38	9	9	10	10	13	66	14
PD	PD	PD	Enrolled	74.7543	2	92.9	180	RAWHITE	18	1	22.4	0	1.27273	0.4	2	50	41	7	2	57	56	52	60	6	10	11	10	12	0	0	1	50	41	28	5	24	25	0	4	1	2	26	5	6	7	8	8	74	10
PD	PD	PD	Enrolled	70.8337	1	72.5	168	RAWHITE	16	1	1.96667	0	0.636364	0.2	2	40	25	9	6	66	63	56	59	8	12	12	12	12	0	0	1	52	49	24	4	43	37	0	14	4	0	10	1	4	2	3	13	70	15
PD	PD	PD	Enrolled	66.0014	2	79.6	181	RAWHITE	15	2	5.1	0	0.0909091	0.4	2	30	18	6	6	44	42	49	38	7	8	9	8	11	2	0	1	56	36	26	5	45	40	0	8	5	2	32	6	9	8	9	10	65	11
PD	PD	PD	Enrolled	55.7481	2	74.3	175	RAWHITE	13	1	17.2333	0	0.181818	0.6	2	48	24	14	10	46	55	55	58	6	9	11	11	12	0	0	1	25	19	26	5	54	51	0	16	9	5	35	8	9	9	9	11	55	12
[truncated: 5 more columns]

## Sheet: H&Y=1
Enroll Category											PD characteristics				H&Y	UDPRS				HVLT-R												SFT	SDM	MOCA	GDS-15	STAI		QUIP	Scopa AUT	ESS	RBD	UPSIT					LNS
RECRUITMENT_CAT	IMAGING_CAT	ENROLL_CAT	Status	Age (baseline)	Gender	Weight(Kg)	Height(cm)	Race	Education Years	Handedness	Duration of dx (M)	Family History of PD (No)	Tremor Score	PIGD score		UPDRS Total	UPDRS3	UPDRS2	UPDRS1	DVT_TOTAL_RECALL	DVT_DELAYED_RECALL	DVT_RETENTION	DVT_RECOG_DISC_INDEX	HVLTRT1	HVLTRT2	HVLTRT3	HVLTRDLY	HVLTREC	HVLTFPRL	HVLTFPUN	HVLTVRSN					STAI State	STAI Trait					Total	1	2	3	4	LNS TOTRAW	Age Assess LNS	DVS-LNS
PD	PD	PD	Enrolled	49.7495	1	62.6	152	RAWHITE	15	1	1.03333	0	0.909091	0	1	28	24	2	2	66	61	56	57	10	12	12	12	12	0	0	1	52	47	30	5	44	33	3	3	12	4	24	7	7	4	6	14	49	14
PD	PD	PD	Enrolled	62.1684	2	89.5	177	RAWHITE	16	1	4.03333	0	1	0.2	1	29	19	6	4	44	45	48	52	5	10	10	9	12	1	0	1	55	48	30	5	30	34	2	6	3	3	30	8	7	7	8	11	62	12
PD	PD	PD	Enrolled	57.1691	2	97.5	170	RAWHITE	16	3	4.03333	0	0.545455	0	1	23	16	3	4	36	44	65	37	6	8	8	9	11	2	0	1	52	36	27	6	31	38	0	8	5	2	30	7	8	6	9	8	57	8
PD	PD	PD	Enrolled	43.833	2	78.2	180	RAWHITE	18	1	2.03333	0	0.181818	0.2	1	17	10	5	2	42	39	37	49	6	8	11	8	12	1	0	1	45	46	29	5	24	25	2	0	2	7	35	10	10	7	8	13	43	13
PD	PD	PD	Enrolled	38.4997	2	88.1	173	RAWHITE	17	1	1.96667	1	0.0909091	0.2	1	17	8	5	4	59	49	44	58	9	12	11	10	12	0	0	1	41	50	29	4	33	43	0	5	5	8	31	8	7	8	8	11	38	10
PD	PD	PD	Enrolled	62.2505	1	53.6	161	RAWHITE	18	1	10.2	1	0.818182	0.2	1	20	18	0	2	48	35	30	44	6	11	10	7	10	0	0	1	53	39	22	5	28	30	0	0	9	2	36	10	9	9	8	11	62	12
PD	PD	PD	Enrolled	50.4997	2	81.7	175	RAWHITE	18	1	4.06667	0	0.727273	0.2	1	28	21	1	6	43	44	47	45	7	8	10	9	12	2	0	1	63	51	28	5	36	35	0	5	7	1	27	7	5	7	8	13	50	13
PD	PD	PD	Enrolled	57.2485	1	66.7	171	RAWHITE	20	1	10.1667	0	0.636364	0.4	1	19	15	2	2	41	33	31	51	5	10	9	7	12	1	0	1	53	49	28	5	25	33	0	2	1	3	24	7	6	6	5	11	57	12
PD	PD	PD	Enrolled	59.0856	1	61.2	171	RAWHITE	16	1	3.06667	0	0.272727	0.2	1	17	13	2	2	51	56	62	52	9	10	9	11	12	1	0	1	52	46	30	4	26	37	0	8	3	1	32	9	9	7	7	14	59	15
PD	PD	PD	Enrolled	54.4969	1	56.1	152	RAWHITE	16	2	3	0	0.545455	0.4	1	20	16	2	2	56	55	55	58	8	11	11	11	12	0	0	1	59	38	29	5	26	30	0	13	0	4	36	9	9	9	9	12	54	12
PD	PD	PD	Enrolled	67.2498	2	74.3	175	RAWHITE	18	1	5.1	3	0.454545	0	1	20	16	2	2	26	32	47	38	3	6	7	6	10	1	0	1	67	41	28	5	31	31	0	12	6	2	28	7	8	5	8	9	67	10
PD	PD	PD	Enrolled	54.0835	1	53	163	RAWHITE	14	1	9.16667	0	0.636364	0.2	1	32	21	3	8	56	50	48	58	9	11	10	10	12	0	0	1	50	50	26	5	40	38	0	10	7	4	36	9	9	8	10	12	54	12
PD	PD	PD	Enrolled	66.5818	1	60.3	165	RAWHITE	18	1	7.1		0.727273	0.6	1	35	18	11	6	58	63	57	52	7	11	12	12	11	0	0	1	56	43	26	4	38	43	0	11	6	7	30	8	8	7	7	8	66	9
PD	PD	PD	Enrolled	54.3381	1	63	165	RAWHITE	18	1	5.1	2	0.0909091	0.2	1	15	7	2	6	51	50	55	51	9	10	9	10	12	1	0	1	76	64	27	5	31	37	0	12	10	4	37	10	8	10	9	12	54	12
PD	PD	PD	Enrolled	63.0828	2	73.8	165	RAWHITE	14	1	5.1	0	0.636364	0.2	1	18	14	2	2	49	47	44	45	6	9	11	9	12	2	0	1	26	43	26	5	30	31	0	4	3	2	22	8	6	3	5	9	63	10
PD	PD	PD	Enrolled	39.165	1	71.4	170	RAWHITE	15	1	2.03333	1	0.818182	0	1	26	15	1	10	54	44	38	58	8	10	12	9	12	0	0	1	39	47	29	4	34	32	0	2	4	6	20	3	6	6	5	15	39	15
PD	PD	PD	Enrolled	48.9144	2	97.3	183	RAWHITE	16	1	2.03333	0	0.454545	0.2	1	18	9	3	6	58	55	49	57	8	11	12	11	12	0	0	1	42	50	28	6	29	32	0	5	6	3	12	0	9	2	1	12	48	12
PD	PD	PD	Enrolled	53.7495	1	77.3	163	RAWHITE	16	2	6.06667	1	0.0909091	0.2	1	13	4	7	2	66	55	48	37	10	12	12	11	11	2	0	1	70	56	29	5	24	25	3	5	6	4	31	8	8	7	8	12	53	12
PD	PD	PD	Enrolled	62.9158	2	107.9	182	RAWHITE	16	1	3.03333	1	0.363636	0.4	1	26	16	6	4	27	35	55	80	5	6	7	7	12	4	6	1	37	47	27	4	39	37	0	10	3	1	32	9	7	7	9	9	62	10
PD	PD	PD	Enrolled	52.4983	2	81.6	182	RAWHITE	16	1	1.03333	0	0.181818	0.2	1	19	9	8	2	33	44	47	80	5	6	10	9	11	5	6	1	52	50	29	4	32	33	0	7	1	9	25	6	8	4	7	15	52	15
PD	PD	PD	Enrolled	49.1718	1	79.4	165	RAWHITE	12	1	29.4667	2	1.36364	0	1	45	30	11	4	33	21	80	80	4	8	9	5	12	3	6	1	36	38	29	4	42	53	0	22	4	3	27	7	6	6	8	13	49	13
PD	PD	PD	Enrolled	62.7488	2	111.1	173	HISPLAT+RAWHITE	17	1	1.96667	0	0.272727	0	1	17	11	4	2	34	45	55	80	4	8	9	9	12	6	6	1	56	42	27	6	24	26	0	8	4	4	26	5	7	8	6	8	62	8
PD	PD	PD	Enrolled	55.3292	1	106.5	170	RAWHITE	13	1	0.933333	0	0.181818	0	1	21	11	8	2	80	80	80	80	2	3	8	4	10	6	6	1	40	31	25	5	25	30	0	1	3	3	23	6	6	5	6	9	55	10
PD	PD	PD	Enrolled	51.7481	2	97.5	181	RAWHITE	13	1	2.03333	0	0	0.2	1	29	22	1	6	30	32	46	39	5	7	8	7	11	2	0	1	53	42	27	4	53	54	0	4	6	3	28	8	6	8	6	10	51	10
PD	PD	PD	Enrolled	51.9151	1	78	175	RAWHITE	12	1	5.06667	0	0.545455	0.2	1	28	24	2	2	63	55	49	51	9	12	12	11	12	1	0	1	46	36	29	3	52	64	0	15	8	3	18	2	5	4	7	10	51	10
PD	PD	PD	Enrolled	72	2	100	184	RAWHITE	16	1	18.2333	0	0.272727	0	1	12	7	3	2	42	44	56	42	6	7	7	7	12	3	0	1	48	48	25	3	34	32	2	11	9	9	22	5	7	4	6	8	71	10
PD	PD	PD	Enrolled	48.835	2	84	175	RAWHITE	15	1	5.1	2	0.0909091	0	1	11	7	2	2	38	44	56	39	6	8	9	9	11	1	1	1	34	53	29	5	35	28	0	3	2	3	30	7	7	8	8	12	48	12
PD	PD	PD	Enrolled	56.2464	2	88	174	RAWHITE	9	1	2.03333	0	0.363636	0.4	1	38	18	14	6	39	39	46	37	6	8	9	8	11	2	0	1	38	33	21	3	30	34	1	5	9	1	26	6	6	8	6	7	55	7
PD	PD	PD	Enrolled	56.501	2	85	174	RAWHITE	10	1	2.03333	0	0.272727	0	1	12	7	3	2	56	55	55	51	9	10	11	11	12	1	0	1	46	49	27	6	48	41	0	6	5	4	29	6	7	8	8	10	57	11
PD	PD	PD	Enrolled	54.7515	1	95	175	RAWHITE	11	1	4.1	0	0.272727	0.2	1	25	16	1	8	56	55	55	58	8	11	11	11	12	0	0	1	56	40	28	1	51	54	1	22	11	6	14	3	2	5	4	12	55	13
PD	PD	PD	Enrolled	58.5818	2	82	180	RAWHITE	10	1	4.06667	1	0.363636	0.2	1	27	14	9	4	53	45	55	36	12	9	8	9	12	3	0	1	40	37	28	5	24	25	2	3	5	1	17	4	6	5	2	20	58	19
PD	PD	PD	Enrolled	67.5866	1	78	166	RAWHITE	8	1	2.03333	0	0.545455	0.6	1	31	20	3	8	31	32	39	31	4	6	8	6	12	3	1	1	66	45	25	5	47	38	2	6	5	4	23	4	7	7	5	5	67	5
PD	PD	PD	Enrolled	51.1677	1	50	168	RAWHITE	13	1	4.06667	0	0.636364	0.4	1	27	15	6	6	60	44	47	51	12	10	10	9	12	1	0	1	81	45	27	5	27	32	0	6	6	4	24	6	6	7	5	6	51	6
PD	PD	PD	Enrolled	75.5866	2	89	187	RAWHITE	14	1	4.1	0	0.545455	0.2	1	34	27	3	4	73	64	56	60	11	12	12	12	12	0	0	1	45	39	28	2	40	39	0	16	10	7	28	7	8	4	9	11	75	14
PD	PD	PD	Enrolled	60.5804	1	69	165	RAWHITE	15	1	3	0	0.272727	0.4	1	27	14	11	2	48	51	55	60	8	9	10	10	12	0	0	1	46	37	29	5	33	32	0	2	4	3	23	7	8	4	4	12	60	13
PD	PD	PD	Enrolled	48.7502	2	84	188	RAWHITE	16	1	3.06667	0	0.363636	0.2	1	37	20	15	2	60	61	56	45	8	12	12	12	12	2	0	1	65	42	30	5	29	33	0	6	9	7	14	2	5	3	4	12	48	12
PD	PD	PD	Enrolled	52.8323	2	113	188	RAWHITE	12	1	8.1	0	0	0.2	1	19	12	3	4	38	50	56	51	5	8	10	10	11	0	0	1	58	50	28	5	31	33	0	14	6	3	20	6	7	1	6	17	52	18
PD	PD	PD	Enrolled	45.9165	2	69.6	171	RAWHITE	12	1	8.16667	3	0.545455	0	1	21	18	1	2	44	59	68	57	6	10	10	12	12	0	0	1	60	50	29	5	27	25	0	2	2	1	27	4	8	7	8	13	45	13
[truncated: 5 more columns]
